# Supplementary material for: Whole genome duplications and expansion of the vertebrate GATA transcription factor gene family
Source: PubMed Central journal article supplement (PMC2857956; doi:10.1186/1471-2148-9-207), 2009-08-20

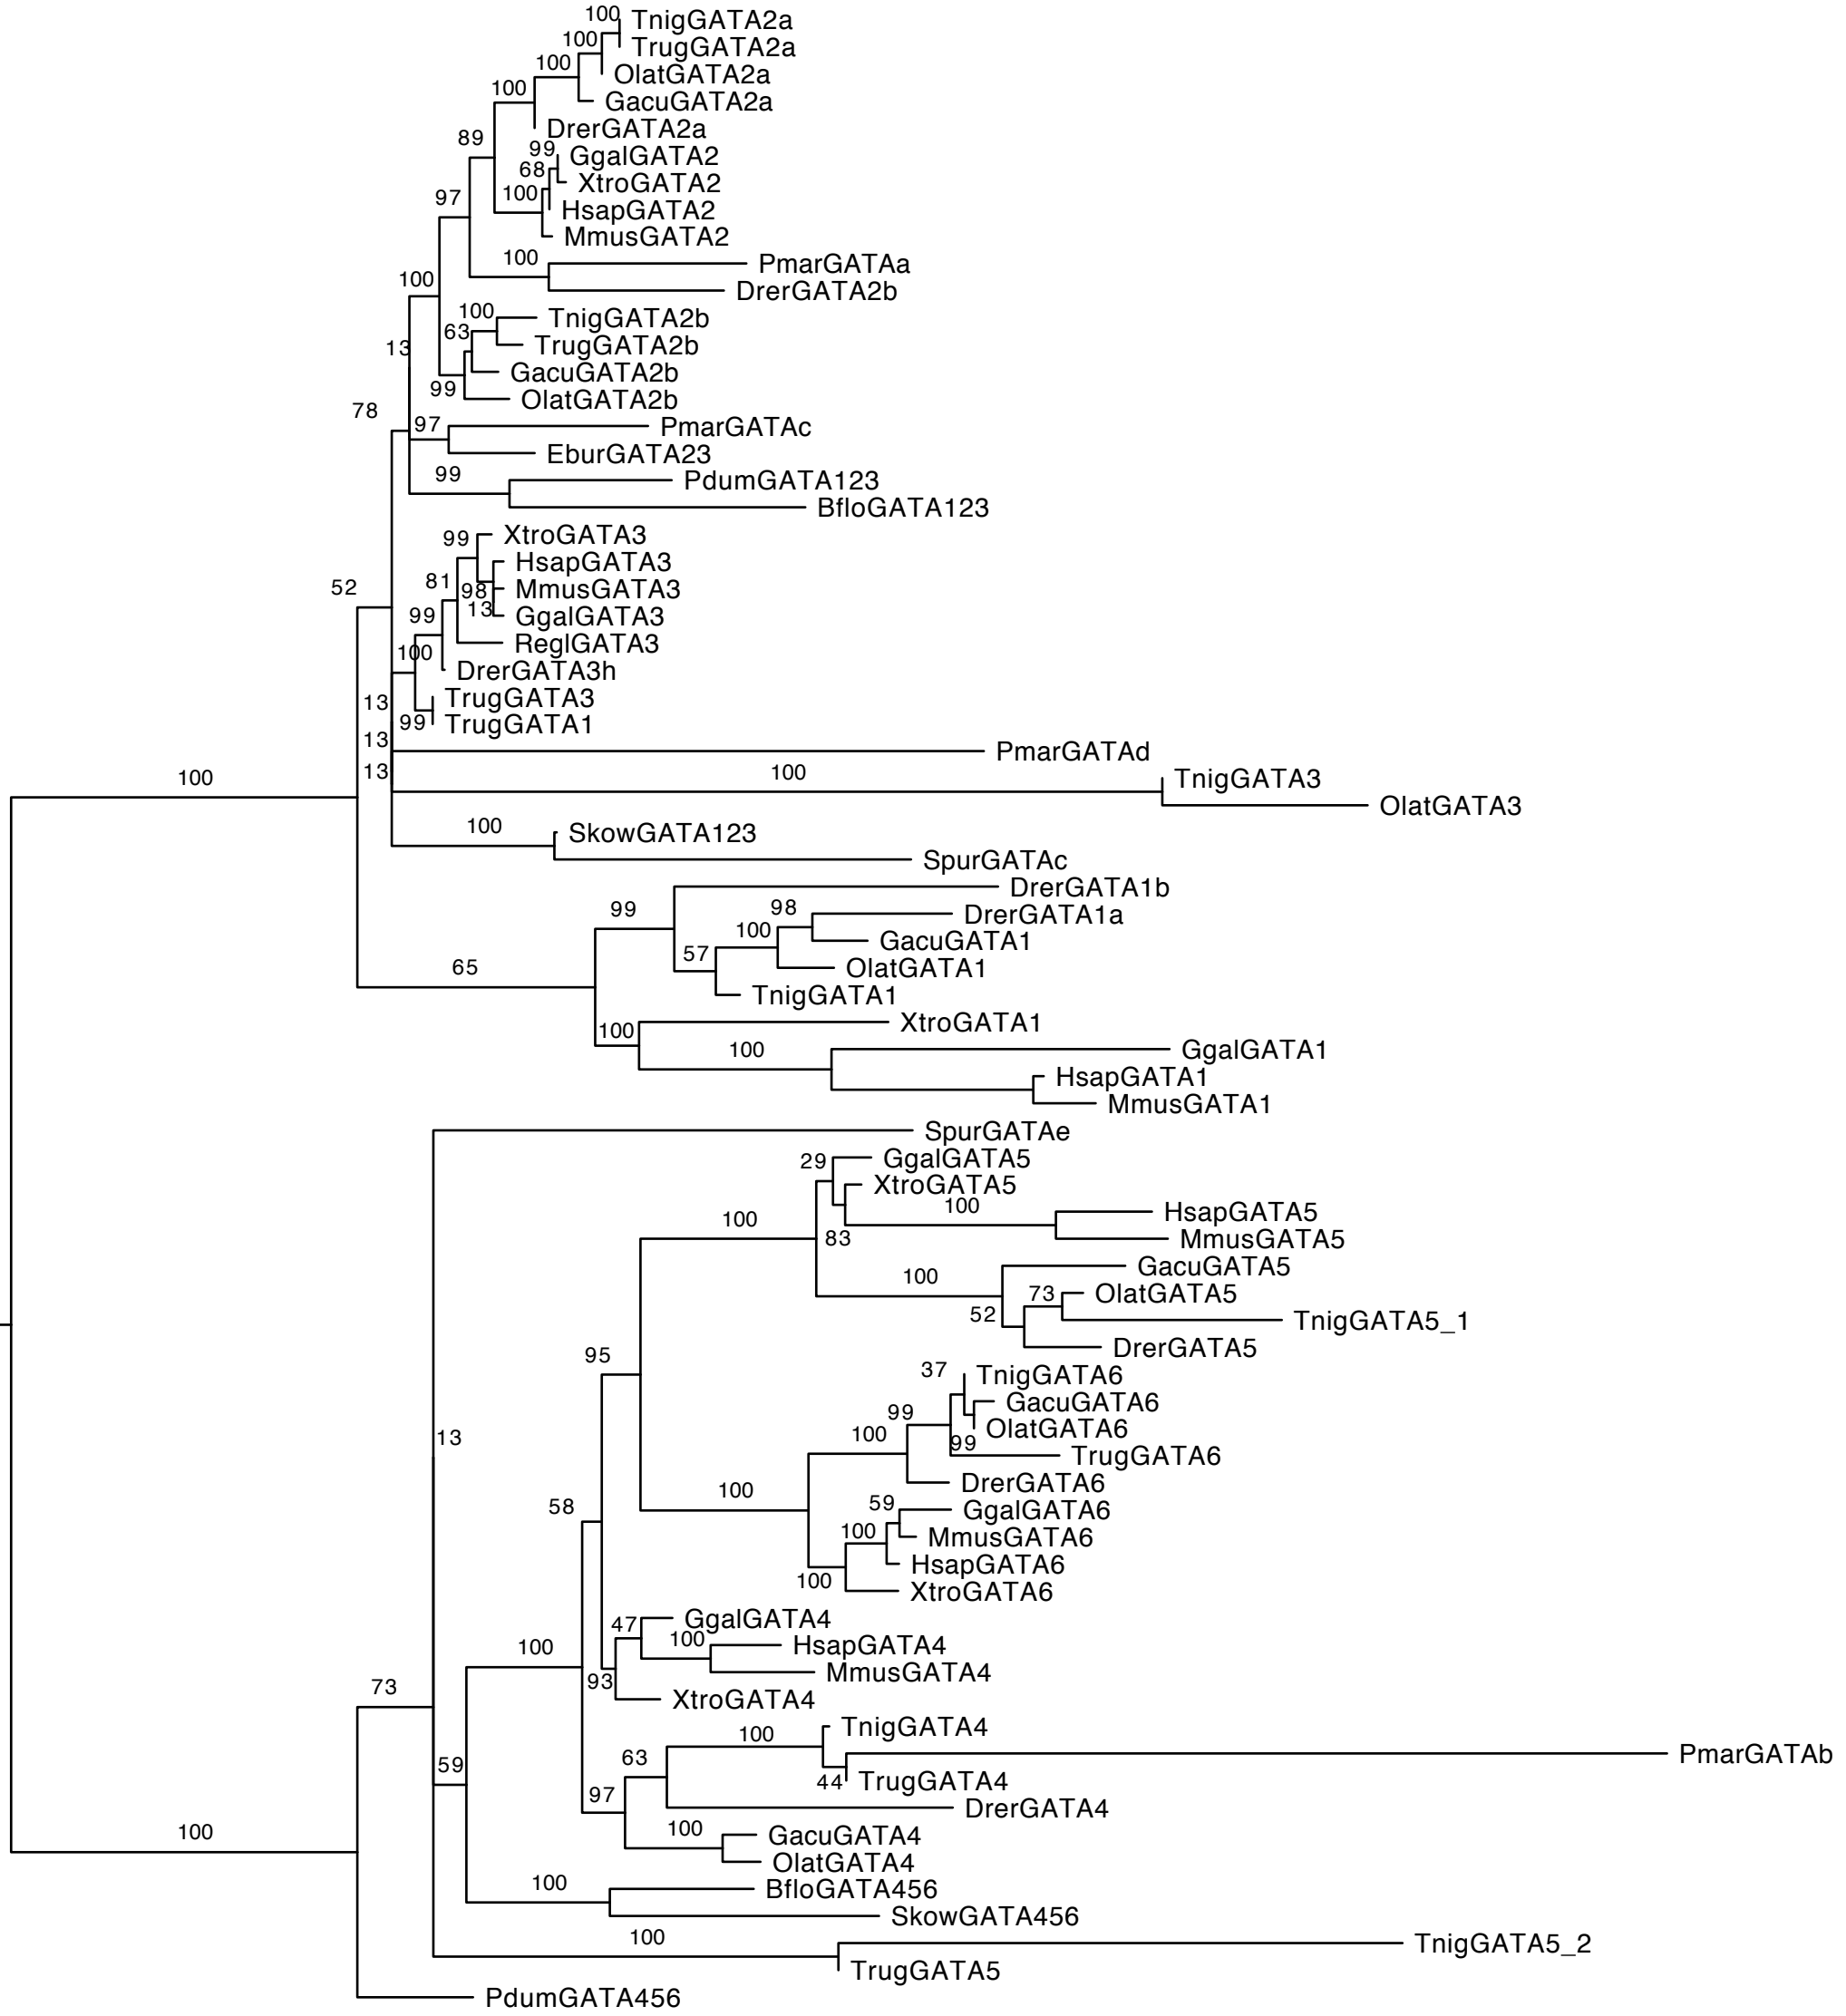

Supplement: 1471-2148-9-207-S1.pdf [file 1471-2148-9-207-S1.pdf]
